# Supplementary figures and images for: Phylogenomic Data Support a Seventh Order of Methylotrophic Methanogens and Provide Insights into the Evolution of Methanogenesis
Source: PubMed Central journal article supplement — Genome Biol Evol. 2013 Aug 28;5(10):1769–80. doi: 10.1093/gbe/evt128 (PMC3814188; doi:10.1093/gbe/evt128), 2013-08-28

### MtmB

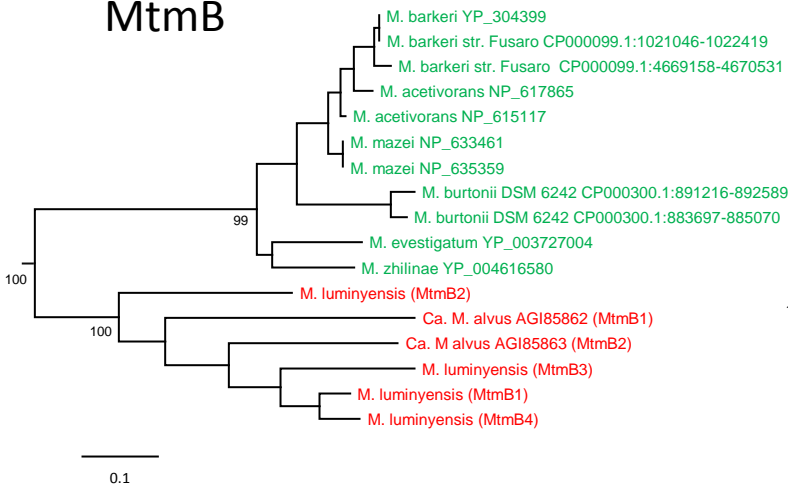

### MtmC

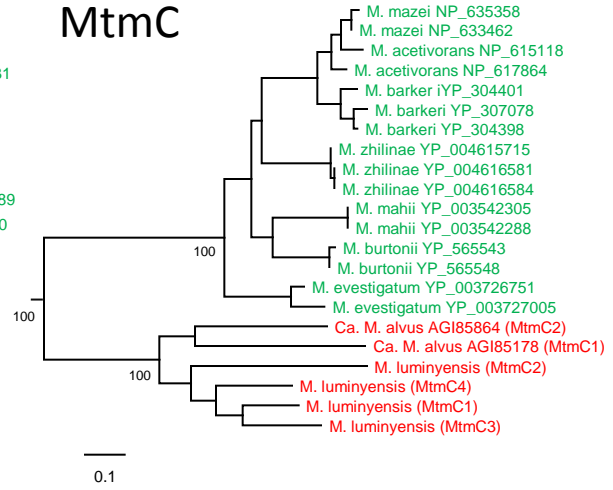

### MtbB

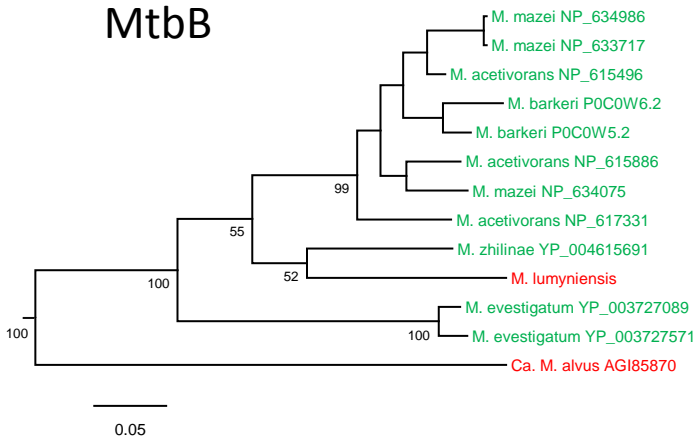

### MtbC

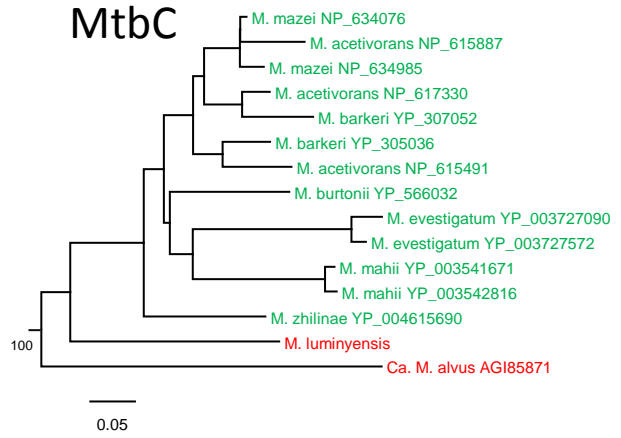

### MttB

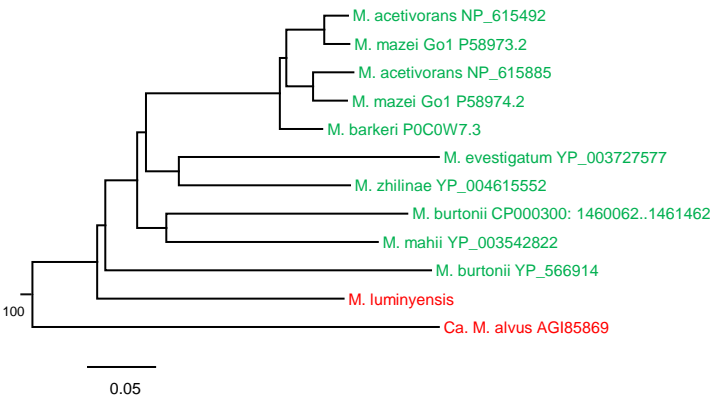

### MttC

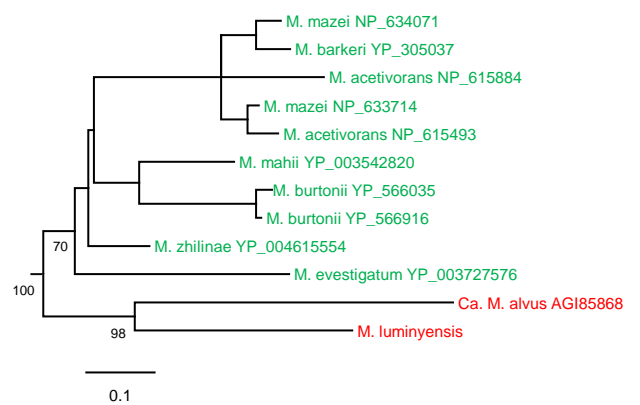

### MtsA

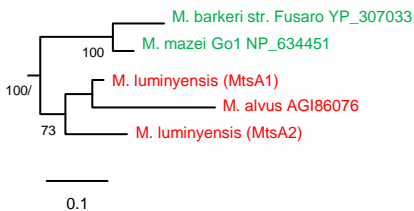

### MtsB

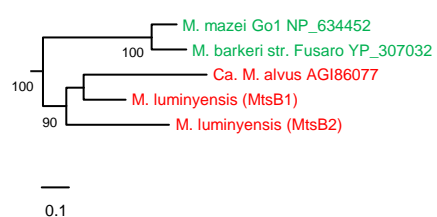

Supplement: supp_evt128_Fig_S1_BGE_resubmission.pdf [file supp_evt128_Fig_S1_BGE_resubmission.pdf]
